# Supplementary material
Source: PubMed Central journal article supplement (PMC6547631)

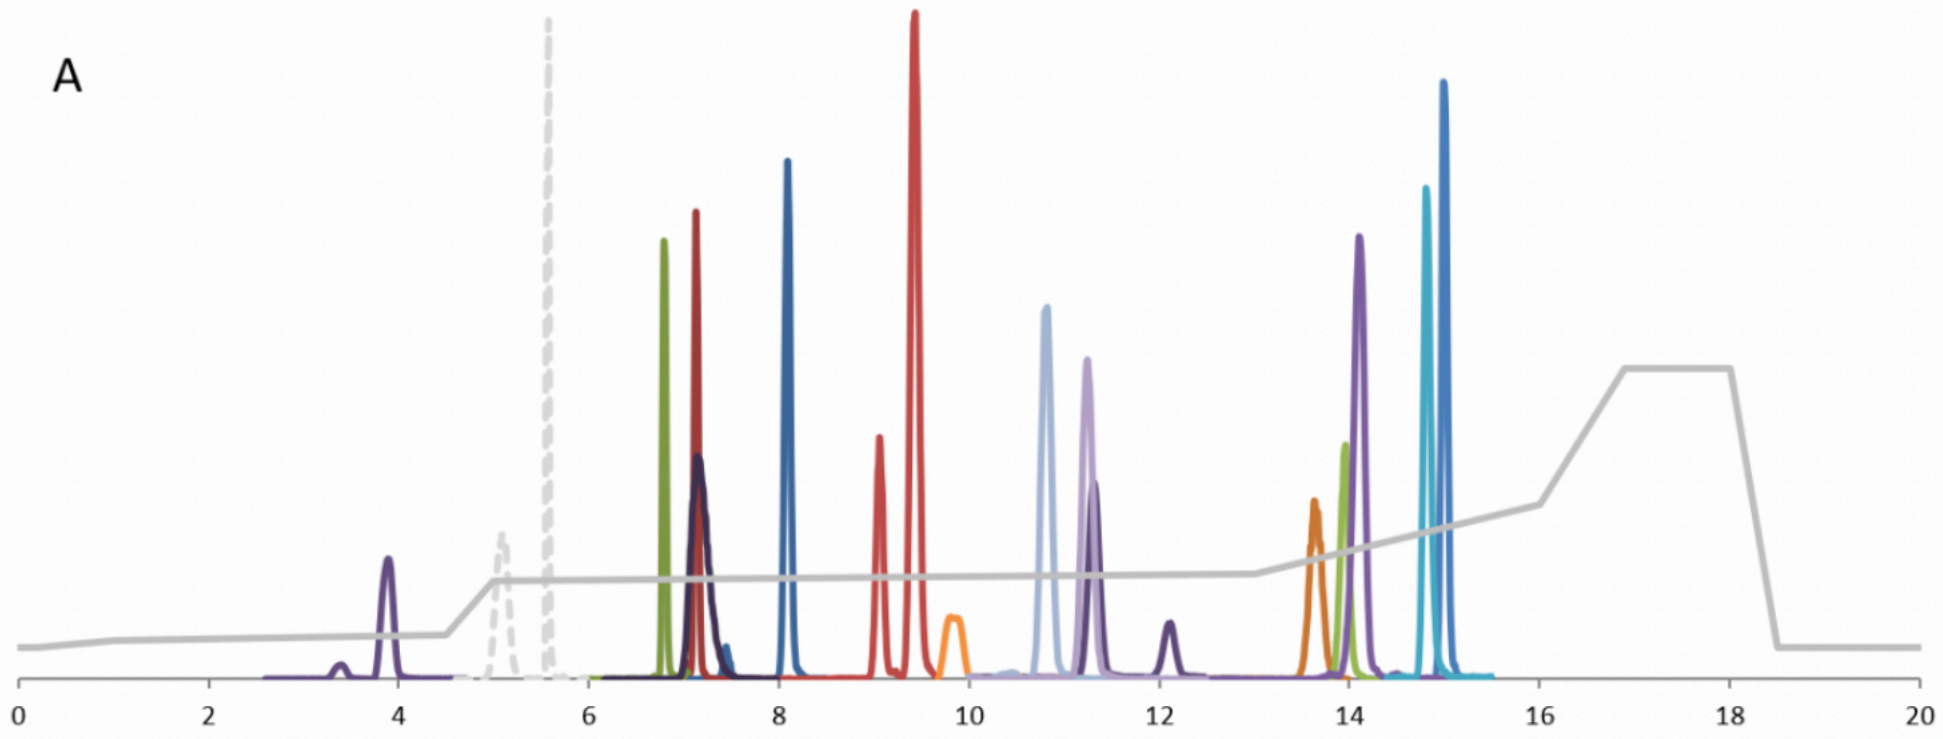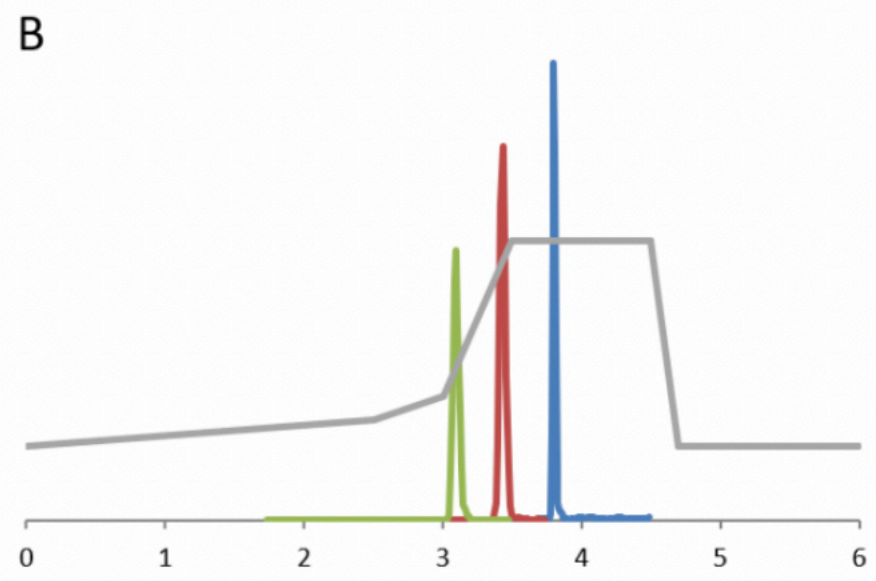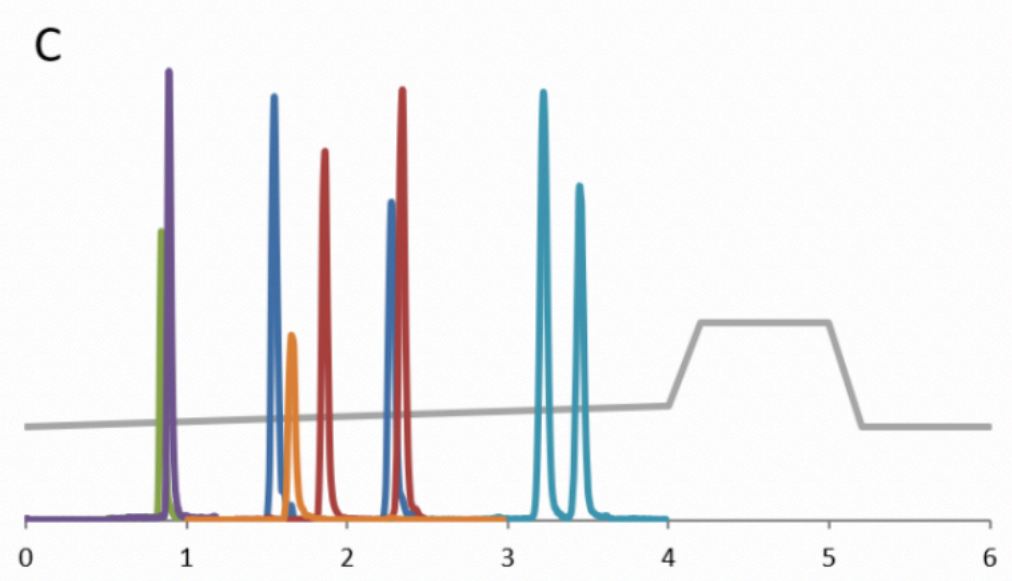

Supplement: 10.1194_D090571_jlr.D090571-4.pdf [file 10.1194_D090571_jlr.D090571-4.pdf]

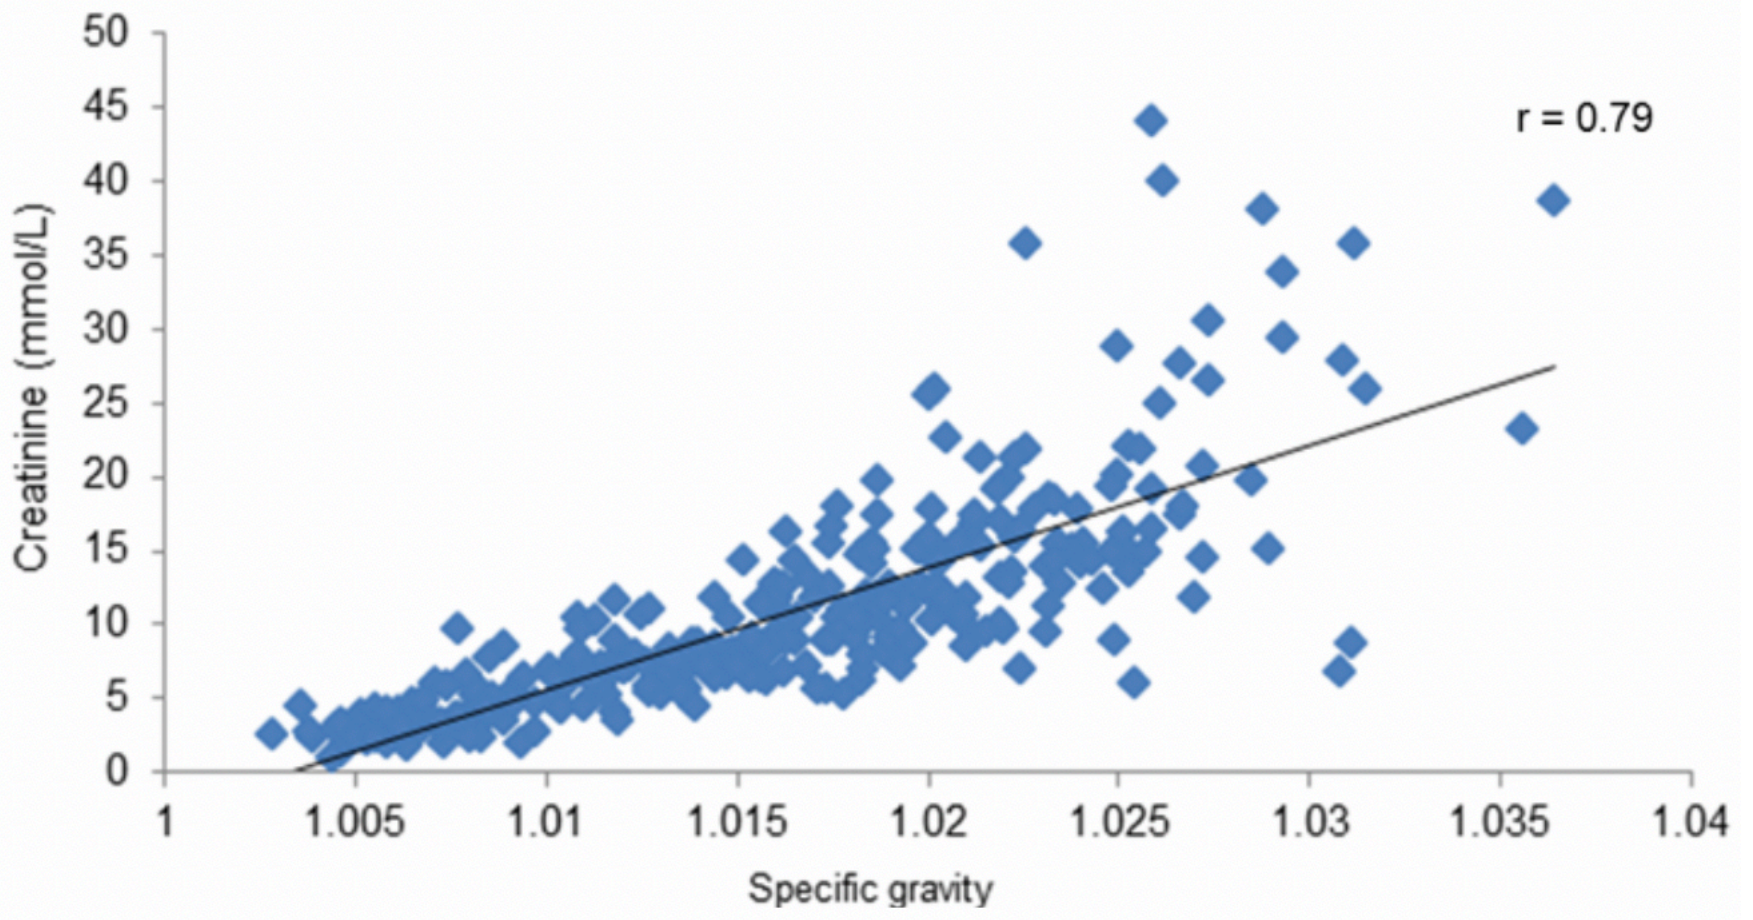

Supplement: 10.1194_D090571_jlr.D090571-5.pdf [file 10.1194_D090571_jlr.D090571-5.pdf]

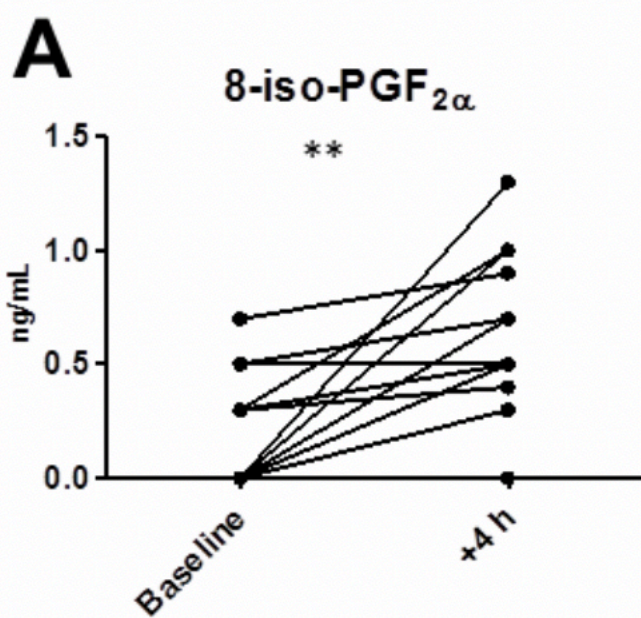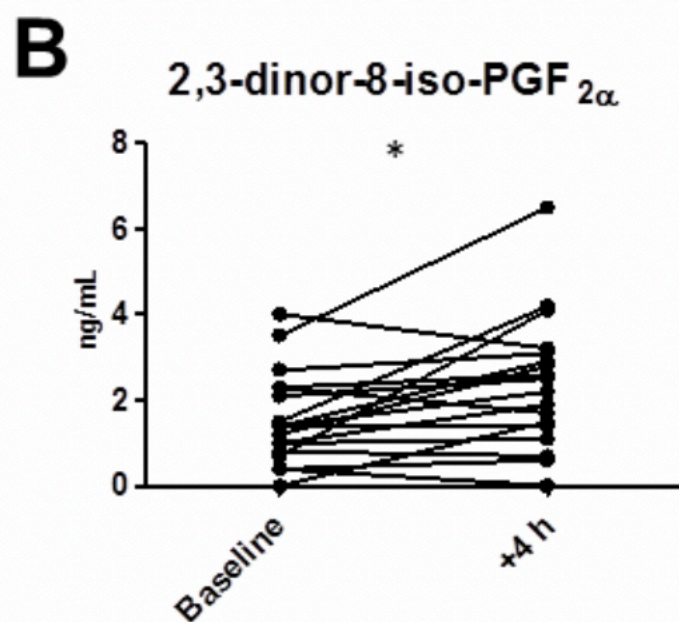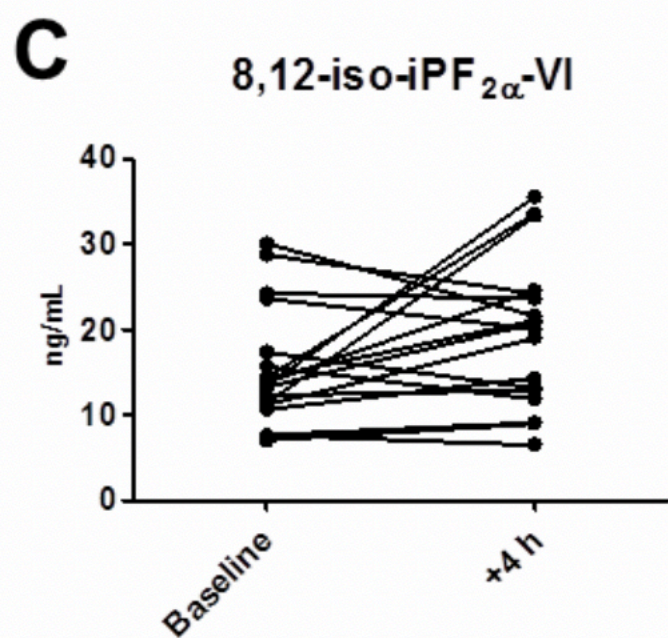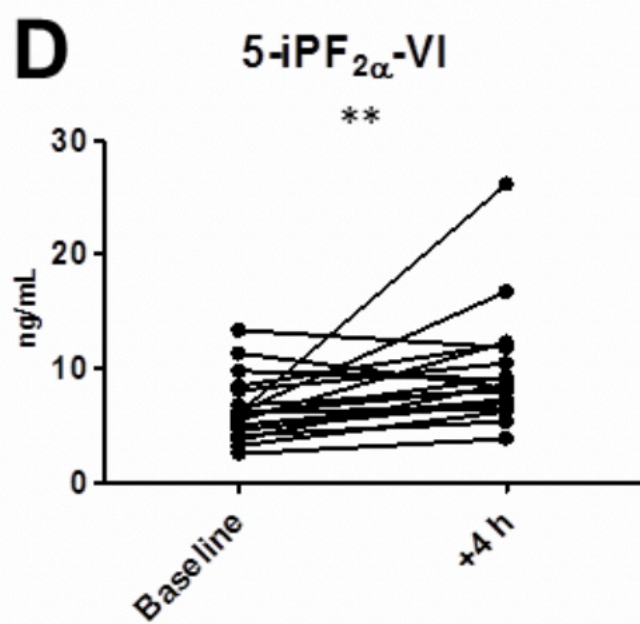

Supplement: 10.1194_D090571_jlr.D090571-6.pdf [file 10.1194_D090571_jlr.D090571-6.pdf]
